# Supplementary material
Source: Springer Nature journal article supplement (https://www.springermedizin.de/resource/supplementary/12955_2012_1063_MOESM1_ESM.pdf/9559010)
Supplement: MOESM1 [file 9559010]

## Severity Index

0

11111

1

11112

11121

11211

12111

21111

2

11113

11122

11131

12121

12211

3

11312

22112

22121

4

11133

12222

13212

13311

21222

21312

22122

32211

5

12223

21133

21232

22222

6

21323

22331

23321

33212

7

13332

22233

22323

23232

23313

32223

32232

32313

32331

33321

8

33232

9

33323

10

33333
